# Supplementary material for: Piezo1 Mechano-Activation Is Augmented by Resveratrol and Differs between Colorectal Cancer Cells of Primary and Metastatic Origin
Source: MDPI journal article supplement (doi:10.3390/molecules27175430), 2022-08-25
Supplement: s1 [file s1]

## Supplementary Materials

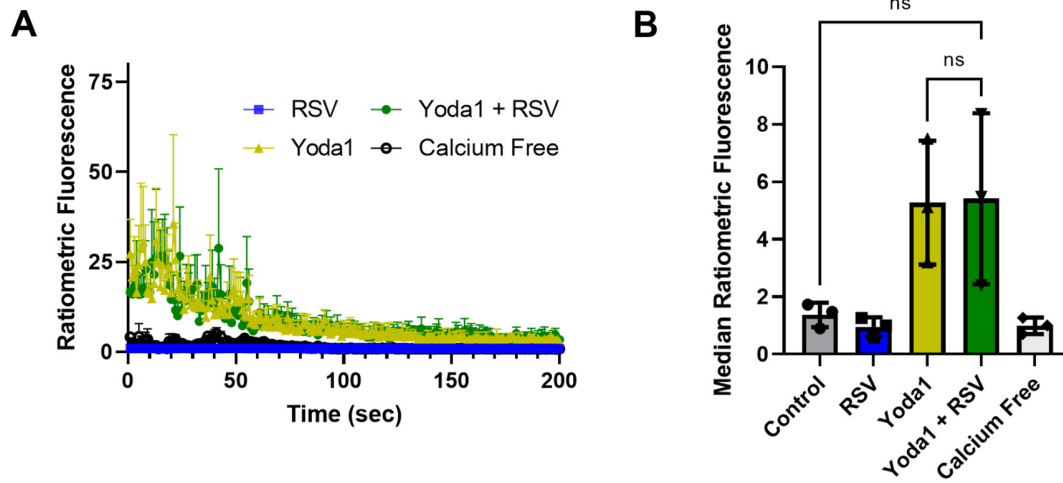

**Figure S1.** Resveratrol has no effect on calcium influx following Yoda1 treatment in SW620 cells. **(A)** Median ratiometric fluorescence as a function of time in SW620 cells. N=3. Error bars represent mean + SEM. **(B)** Average ratiometric calcium fluorescence over 200 sec after Yoda1 treatment. N=3, *ns* = not significant (one-way ANOVA with multiple comparisons). Error bars represent mean  $\pm$  SD.

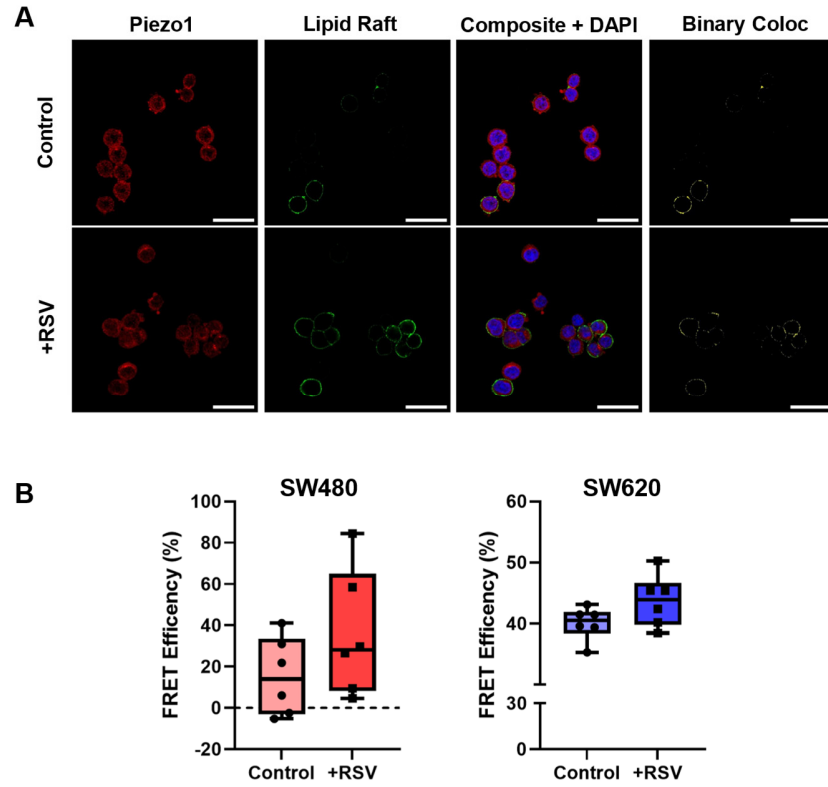

**Figure S2.** Resveratrol increases Piezo1-lipid raft colocalization. **(A)** Confocal microscopy images of Piezo1 (red), lipid rafts (green), DAPI (blue) and colocalization events between Piezo1 and LR (yellow) in SW620 cells. Scale bar = 30  $\mu$ m. **(B)** FRET efficiency measured via flow cytometry for SW480 and SW620 cells. N=3 (n=6).

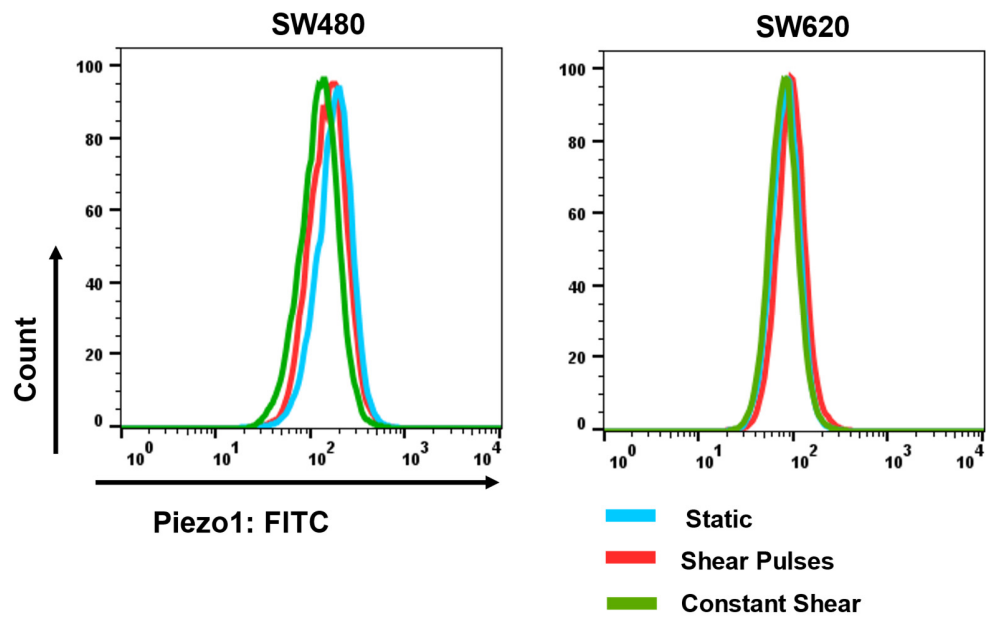

**Figure S3.** Fluid shear stress shows no appreciable effect on Piezo1 expression.

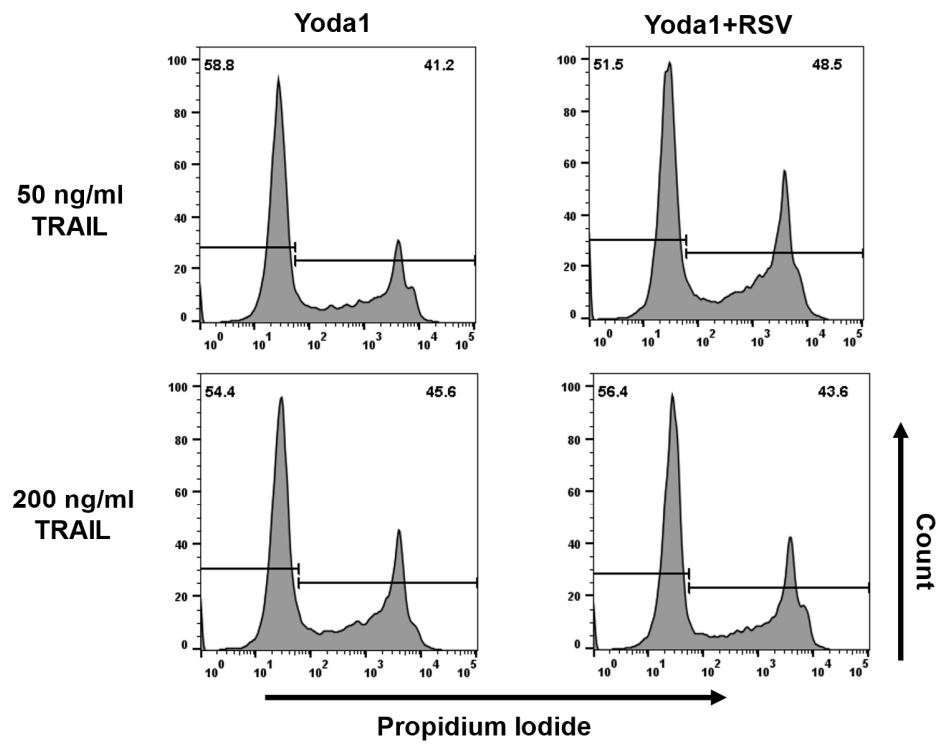

**Figure S4.** Cell viability is similar for SW480 cells treated with Yoda1 and 50 ng/ml or 200 ng/ml of TRAIL.

**Table S1:** List of reactions used in the computational model and their associated kinetic constants. (Adopted from Hope, J.M.; Lopez-Cavestany, M.; Wang, W.; Reinhart-King, C.A.; King, M.R. Activation of Piezo1 Sensitizes Cells to TRAIL-Mediated Apoptosis through Mitochondrial Outer Membrane Permeability. *Cell Death Dis.* **2019**, *10*, 837. <https://doi.org/10.1038/s41419-019-2063-6>.)

| Reaction                                                                             | $k_i$          | $k_{-i}$      | $k_c$         | Ref. |
|--------------------------------------------------------------------------------------|----------------|---------------|---------------|------|
| $L + R \leftrightarrow L:R \rightarrow R^*$                                          | $4 * 10^{-6}$  | $5 * 10^{-3}$ | $1 * 10^{-5}$ | (57) |
| $flip + DISC \leftrightarrow flip: Disc$                                             | $5 * 10^{-7}$  | $5 * 10^{-4}$ | NA            | (57) |
| $pC8 + DISC \leftrightarrow pC8: DISC \rightarrow C8 + DISC$                         | $5 * 10^{-7}$  | $5 * 10^{-4}$ | 1             | (57) |
| $C8 + BAR \leftrightarrow C8: BAR$                                                   | $5 * 10^{-8}$  | $5 * 10^{-4}$ | NA            | (57) |
| $pC3 + C8 \leftrightarrow pC3: C8 \rightarrow C3 + C8$                               | $5 * 10^{-8}$  | $5 * 10^{-4}$ | 1             | (57) |
| $pC6 + C3 \leftrightarrow pC6: C3 \rightarrow C6 + C3$                               | $5 * 10^{-7}$  | $5 * 10^{-4}$ | 1             | (57) |
| $pC8 + C6 \leftrightarrow pC8: C6 \rightarrow C8 + C6$                               | $6 * 10^{-9}$  | $5 * 10^{-4}$ | 1             | (57) |
| $XIAP + C3 \leftrightarrow XIAP: C3 \rightarrow XIAP + C3_{ub}$                      | $2 * 10^{-7}$  | $1 * 10^{-4}$ | $1 * 10^{-4}$ | (57) |
| $PARP + C3 \leftrightarrow PARP: C3 \rightarrow cPARP + C3$                          | $1 * 10^{-7}$  | $1 * 10^{-3}$ | 1             | (57) |
| $Bid + C8 \leftrightarrow Bid: C8 \rightarrow tBid + C8$                             | $5 * 10^{-7}$  | $1 * 10^{-4}$ | 1             | (57) |
| $tBid + Bcl2c \leftrightarrow tBid: Bcl2c$                                           | $1 * 10^{-8}$  | $1 * 10^{-4}$ | NA            | (57) |
| $Bax + tBid \leftrightarrow Bax: tBid \rightarrow aBax + tBid$                       | $1 * 10^{-9}$  | $1 * 10^{-4}$ | 1             | (57) |
| $aBax \leftrightarrow MBax$                                                          | 0.01           | 0.01          | NA            | (57) |
| $MBax + Bcl2 \leftrightarrow MBax: Bcl2$                                             | $1 * 10^{-7}$  | $1 * 10^{-4}$ | NA            | (57) |
| $MBax + MBax \leftrightarrow Bax2$                                                   | $1 * 10^{-7}$  | $1 * 10^{-4}$ | NA            | (57) |
| $Bax2 + Bax2 \leftrightarrow Bax4$                                                   | $1 * 10^{-7}$  | $1 * 10^{-4}$ | NA            | (57) |
| $Bax4 + Bcl2 \leftrightarrow Bax4: Bcl2$                                             | $1 * 10^{-7}$  | $1 * 10^{-4}$ | NA            | (57) |
| $Bax4 + Mito \leftrightarrow Bax4: Mito \rightarrow AMito$                           | $1 * 10^{-7}$  | $1 * 10^{-4}$ | 1             | (57) |
| $AMito + mCytoc \leftrightarrow AMito: mCytoc \rightarrow AMito + ACytoc$            | $2 * 10^{-7}$  | $1 * 10^{-4}$ | 10            | (57) |
| $AMito + mSmac \leftrightarrow AMito: mSmac \rightarrow AMito + ASmac$               | $2 * 10^{-7}$  | $1 * 10^{-4}$ | 10            | (57) |
| $ACytoc \leftrightarrow cCytoc$                                                      | 0.01           | 0.01          | NA            | (57) |
| $APAF + cCytoc \leftrightarrow APAF: cCytoc \rightarrow APAF^*$                      | $5 * 10^{-8}$  | $1 * 10^{-4}$ | 1             | (57) |
| $APAF^* + pC9 \leftrightarrow Apop$                                                  | $5 * 10^{-9}$  | $1 * 10^{-4}$ | NA            | (57) |
| $Apop + pC3 \leftrightarrow Apop: pC3 \rightarrow Apop + C3$                         | $5 * 10^{-8}$  | $1 * 10^{-4}$ | 1             | (57) |
| $ASmac \leftrightarrow cSmac$                                                        | 0.01           | 0.01          | NA            | (57) |
| $Apop + XIAP \leftrightarrow Apop: XIAP$                                             | $2 * 10^{-7}$  | $1 * 10^{-4}$ | NA            | (57) |
| $cSmac + XIAP \leftrightarrow cSmac: XIAP$                                           | $7 * 10^{-7}$  | $1 * 10^{-4}$ | NA            | (57) |
| $calcium + calpain \leftrightarrow calpain: ca$                                      | $5 * 10^{-10}$ | $1 * 10^{-4}$ | NA            | (58) |
| $calcium + calpastatin \leftrightarrow calpastatin^*$                                | $5 * 10^{-10}$ | $1 * 10^{-4}$ | NA            | NA   |
| $calpastatin^* + calpain: ca \leftrightarrow calpastatin^* \rightarrow calpain_{bl}$ | $3 * 10^{-7}$  | $1 * 10^{-4}$ | 1             | NA   |
| $C3 + calpain_{bl} \leftrightarrow C3: calpain_{bl} \rightarrow C3 + calpain^*$      | $1 * 10^{-7}$  | $1 * 10^{-4}$ | 1             | NA   |
| $calpain^* + Bid \leftrightarrow calpain^*: Bid \rightarrow tBid + calpain^*$        | $5 * 10^{-7}$  | $1 * 10^{-4}$ | 1             | NA   |
| $calpain^* + Bcl2c \leftrightarrow calpain^*: Bcl2c \rightarrow calpain^* + cBcl2c$  | $2 * 10^{-7}$  | $1 * 10^{-4}$ | 0.1           | NA   |

**Table S2:** Non-zero initial conditions utilized in the computational model.

| Molecule                      | Basal initial condition (#/CC)                                                                                                                                                                  | Ref.                           |
|-------------------------------|-------------------------------------------------------------------------------------------------------------------------------------------------------------------------------------------------|--------------------------------|
| [ <i>Ligand</i> ]             | $3000 = 50 \frac{ng}{mL}$<br>$0 = 0 \frac{ng}{mL}$<br>$30 = 0.05 \frac{ng}{mL}$<br>$12000 = 200 \frac{ng}{mL}$                                                                                  | (57)                           |
| [ <i>Calcium</i> ]            | <i>Calcium free buffer</i> = 0.116 ( $\mu M$ )<br><i>Control</i> = 0.162 ( $\mu M$ )<br><i>RSV</i> = 0.134 ( $\mu M$ )<br><i>Yoda1</i> = 1 ( $\mu M$ )<br><i>Yoda1 + RSV</i> = 1.76 ( $\mu M$ ) | <i>In vitro calcium values</i> |
| [ <i>Receptor</i> ]           | 200                                                                                                                                                                                             | (57)                           |
| [ <i>FLIP</i> ]               | $1 * 10^2$                                                                                                                                                                                      | (57)                           |
| [ <i>pC8</i> ]                | $2 * 10^4$                                                                                                                                                                                      | (57)                           |
| [ <i>BAR</i> ]                | $1 * 10^3$                                                                                                                                                                                      | (57)                           |
| [ <i>pC3</i> ]                | $1 * 10^4$                                                                                                                                                                                      | (57)                           |
| [ <i>pC6</i> ]                | $1 * 10^4$                                                                                                                                                                                      | (57)                           |
| [ <i>PARP</i> ]               | $1 * 10^6$                                                                                                                                                                                      | (57)                           |
| [ <i>Bid</i> ]                | $4 * 10^4$                                                                                                                                                                                      | (57)                           |
| [ <i>Bax</i> ]                | $1 * 10^5$                                                                                                                                                                                      | (57)                           |
| [ <i>Mito</i> ]               | $5 * 10^5$                                                                                                                                                                                      | (57)                           |
| [ <i>Cytochrome C</i> ]       | $5 * 10^5$                                                                                                                                                                                      | (57)                           |
| [ <i>Smac</i> ]               | $1 * 10^5$                                                                                                                                                                                      | (57)                           |
| [ <i>pC9</i> ]                | $1 * 10^5$                                                                                                                                                                                      | (57)                           |
| [ <i>APAF</i> ]               | $1 * 10^5$                                                                                                                                                                                      | (57)                           |
| [ <i>Calpain</i> ]            | $1 * 10^5$                                                                                                                                                                                      | (58)                           |
| [ <i>Calpastatin</i> ]        | $1 * 10^5$                                                                                                                                                                                      | (NA)                           |
| [ <i>cytosolic Bcl2</i> ]     | $2 * 10^6$                                                                                                                                                                                      | (57)                           |
| [ <i>mitochondrial Bcl2</i> ] | $2 * 10^4$                                                                                                                                                                                      | (57)                           |

|          |            |      |
|----------|------------|------|
| $[XIAP]$ | $1 * 10^5$ | (57) |
|----------|------------|------|

All species which are not listed have an initial condition equal to 1.
